# Supplementary material for: Ankle–Brachial Index and Risk of Sudden Cardiac Death in the Community: The ARIC Study
Source: PubMed Central journal article supplement — J Am Heart Assoc. 2024 Mar 8;13(6):e032008. doi: 10.1161/JAHA.123.032008 (PMC11010027; doi:10.1161/jaha.123.032008), 2024-03-08
Supplement: JAH3-13-e032008-s001.pdf [file JAH3-13-e032008-s001.pdf]

# **SUPPLEMENTAL MATERIAL**

Figure S1. Age, race, and sex-adjusted Kaplan-Meier curve with the end point of SCD based on ABI status.

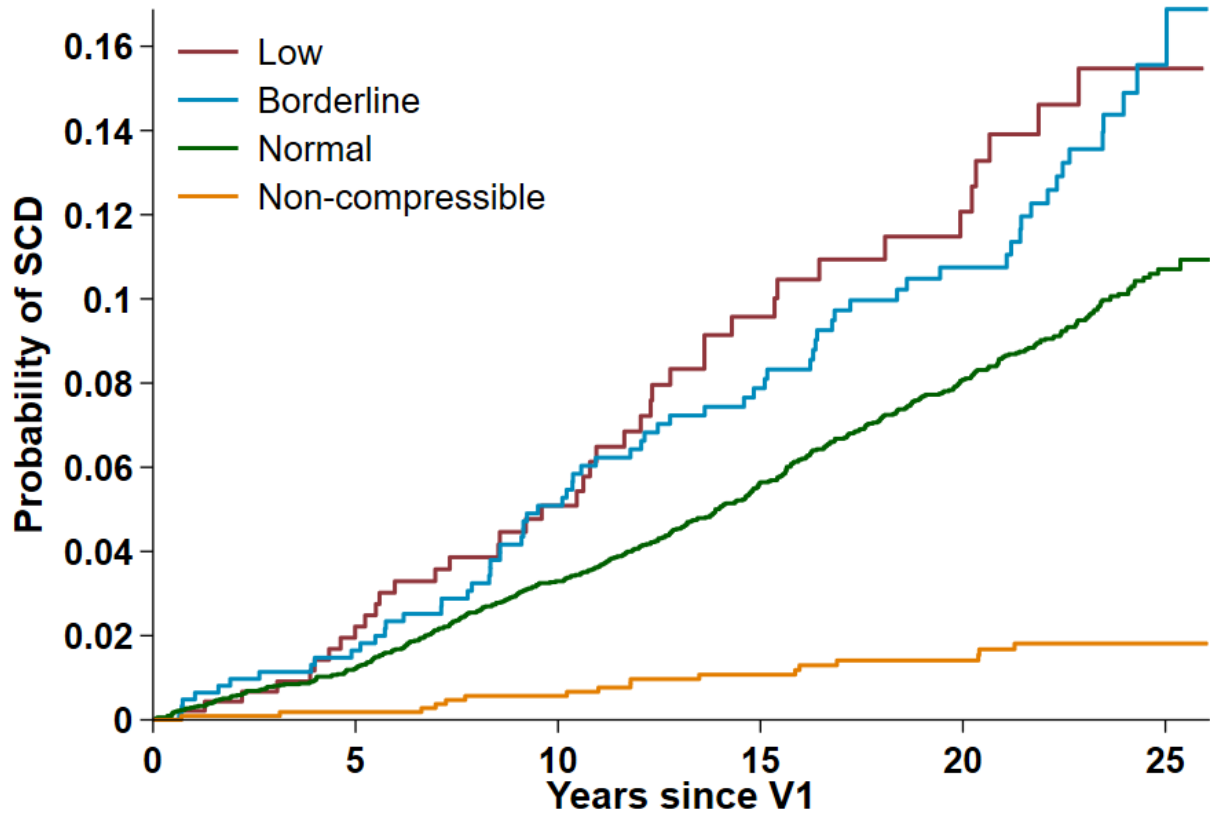

SCD indicates sudden cardiac death; ABI, ankle-brachial index.
